# Supplementary material for: Double-layer CVD graphene as stretchable transparent electrodes
Source: Royal Society of Chemistry journal article supplement (doi:10.1039/c4nr00265b), 2014-01-01
Supplement: c4nr00265b1.pdf [file c4nr00265b1.pdf]

## Supplementary Information for

### Double-Layer CVD Graphene as Stretchable Transparent Electrodes

Sejeong Won<sup>1,†</sup>, Yun Hwangbo<sup>2,†</sup>, Seoung-Ki Lee<sup>3</sup>, Kyung-Shik Kim<sup>2</sup>, Kwang-Seop Kim<sup>2</sup>, Seung-Mo Lee<sup>2</sup>, Hak-Joo Lee<sup>2</sup>, Jong-Hyun Ahn<sup>3</sup>, Jae-Hyun Kim<sup>2,\*</sup> and Soon-Bok Lee<sup>1,\*</sup>

<sup>1</sup> Department of Mechanical Engineering, Korea Advanced Institute of Science and Technology (KAIST), Daejeon, 305-701, Korea

<sup>2</sup> Department of Nanomechanics, Nano-Convergence Mechanical Systems Research Division, Korea Institute of Machinery & Materials (KIMM), 156 Gajungbuk-ro, Yuseong-gu, Daejeon, 305-343, Korea

<sup>3</sup> School of Electrical & Electronic Engineering, Yonsei University, Sinchon dong, Seodaemoon-gu, Seoul, 120-749, Korea

<sup>†</sup> These authors equally contributed to this work.

\* Corresponding authors: [jaehkim@kimm.re.kr](mailto:jaehkim@kimm.re.kr), [sblee@kaist.ac.kr](mailto:sblee@kaist.ac.kr)

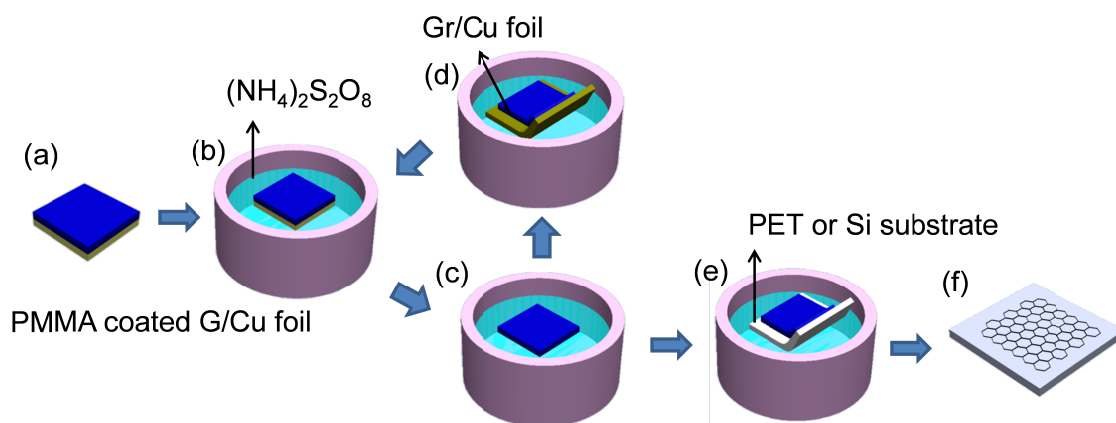

**Figure. S1 Schematic of direct-transfer method.** a) Spin-coating of PMMA as a supporting layer after the synthesis of graphene on a Cu film. b) Floating of the film on 0.1-M  $(\text{NH}_4)_2\text{S}_2\text{O}_8$  solution to dissolve the copper catalyst. c, d) After removing the copper film, the PMMA/graphene film is lifted using another graphene layer grown on a Cu foil. Multiple stacked graphene sheets were fabricated by repeating the process from b) to d). e) Transfer of graphene onto a substrate. f) Removal of the PMMA support by dipping the PMMA/graphene layers/substrate in acetone at 80 °C.

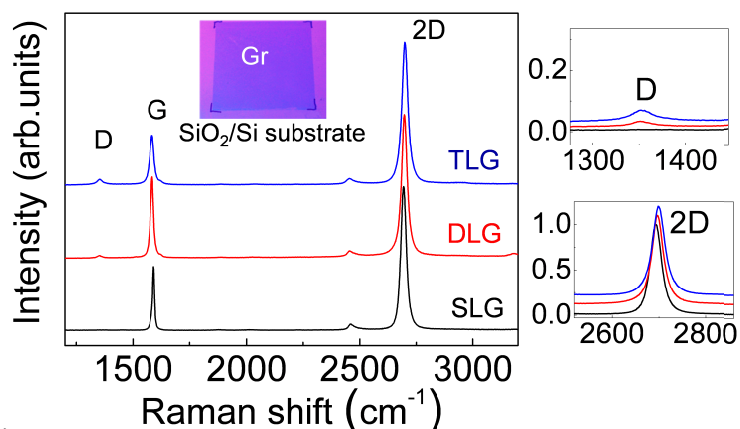

**Figure. S2 Raman spectra of single-layer graphene, double-layer graphene and triple-layer graphene on a SiO<sub>2</sub>/Si substrate.** Comparison of that Raman spectra (excitation wavelength  $\lambda = 514$  nm) measured on single-layer graphene, double-layer graphene, and triple-layer graphene on a SiO<sub>2</sub>/Si substrate. Right side: Raman spectra of the D and 2D bands.

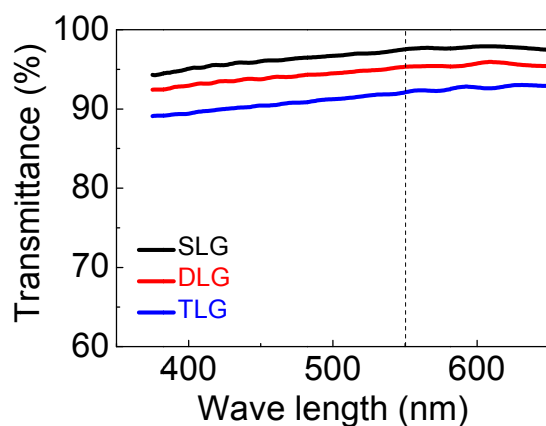

**Figure. S3 Transmittances of graphene on PET with a different number of layers.**

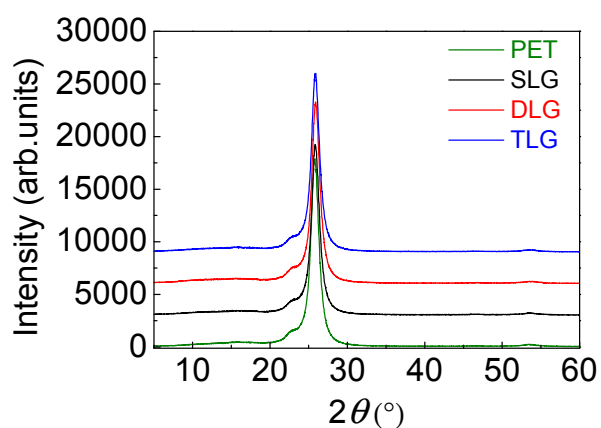

**Figure. S4 XRD diffraction patterns: PET substrate and single-layer, double-layer and triple-layer graphene on the PET substrate.**

**Table. S1 Ratios of the 2D-to-G peak of single-layer graphene, double-layer graphene, and triple-layer graphene**

| Number of layers | Ratio 2D/G |
|------------------|------------|
| SLG              | 2.24       |
| DLG              | 1.76       |
| TLG              | 2.80       |

**Table. S2 Transmittances of graphene on PET with a different number of layers**

| Number of layers | Transmittance (%) |                    |
|------------------|-------------------|--------------------|
|                  | Mean              | Standard deviation |
| SLG              | 97.64             | 0.71               |
| DLG              | 95.65             | 0.93               |
| TLG              | 91.76             | 0.28               |
